# Supplementary material for: Neutrophils Recruited by IL-22 in Peripheral Tissues Function as TRAIL-Dependent Antiviral Effectors against MCMV
Source: PubMed Central journal article supplement (PMC3989063; doi:10.1016/j.chom.2014.03.003), 2014-04-09
Supplement: mmc1.pdf [file mmc1.pdf]

Cell Host & Microbe, Volume 15

## **Supplemental Information**

### **Neutrophils Recruited by IL-22 in Peripheral Tissues Function as TRAIL-Dependent Antiviral Effectors against MCMV**

Maria A. Stacey, Morgan Marsden, Tu Anh Pham N, Simon Clare, Garry Dolton, Gabrielle Stack, Emma Jones, Paul Klenerman, Awen M. Gallimore, Philip R. Taylor, Robert J. Snelgrove, Trevor D. Lawley, Gordon Dougan, Chris A. Benedict, Simon A. Jones, Gavin W.G. Wilkinson, and Ian R. Humphreys

Figure S1

Lung

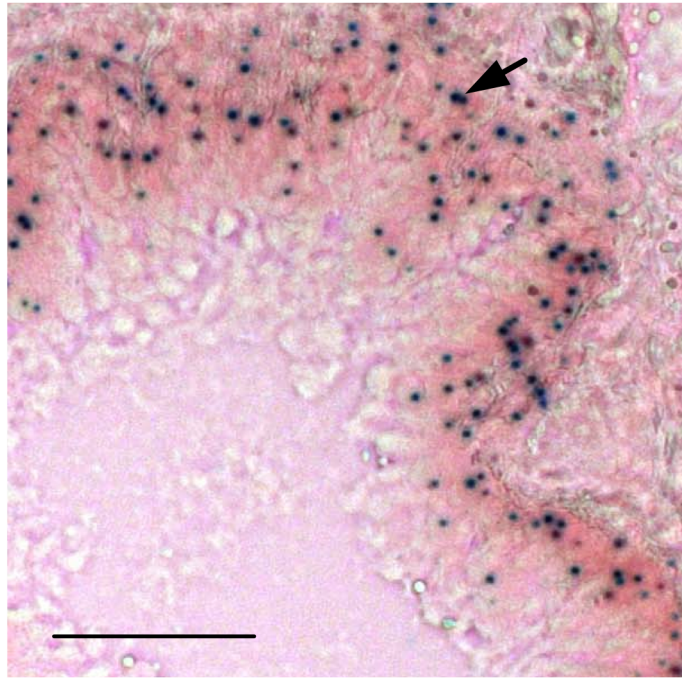

Liver

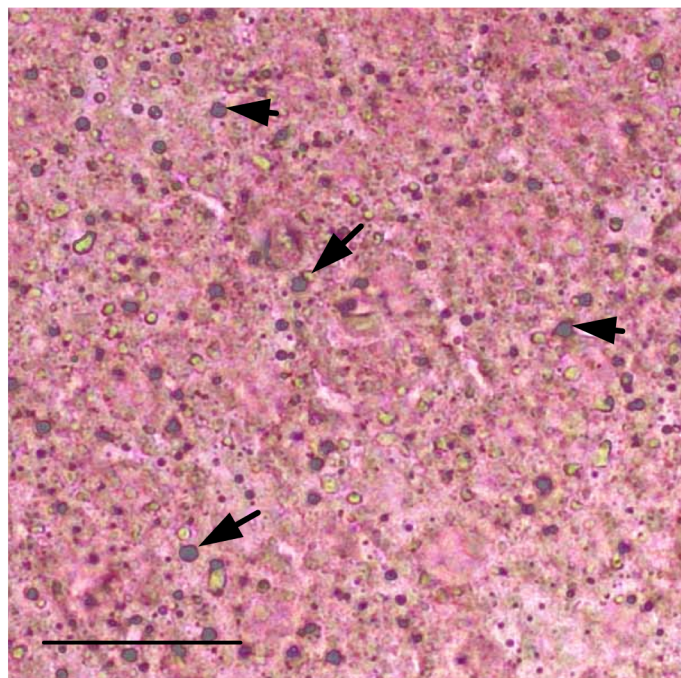

**Figure S1, Related to Figure 1: IL-22R is expressed in the lung and liver.** To assess *Il22ra1*-driven  $\beta$ -galactosidase reporter activity, lung (top) and liver (bottom) sections from *IL-22ra1-LacZ* reporter mice were incubated in X-gal. Arrows depict LacZ<sup>+</sup> epithelial cells (lung) and hepatocytes (liver). Bar = 20 $\mu$ M in all images.

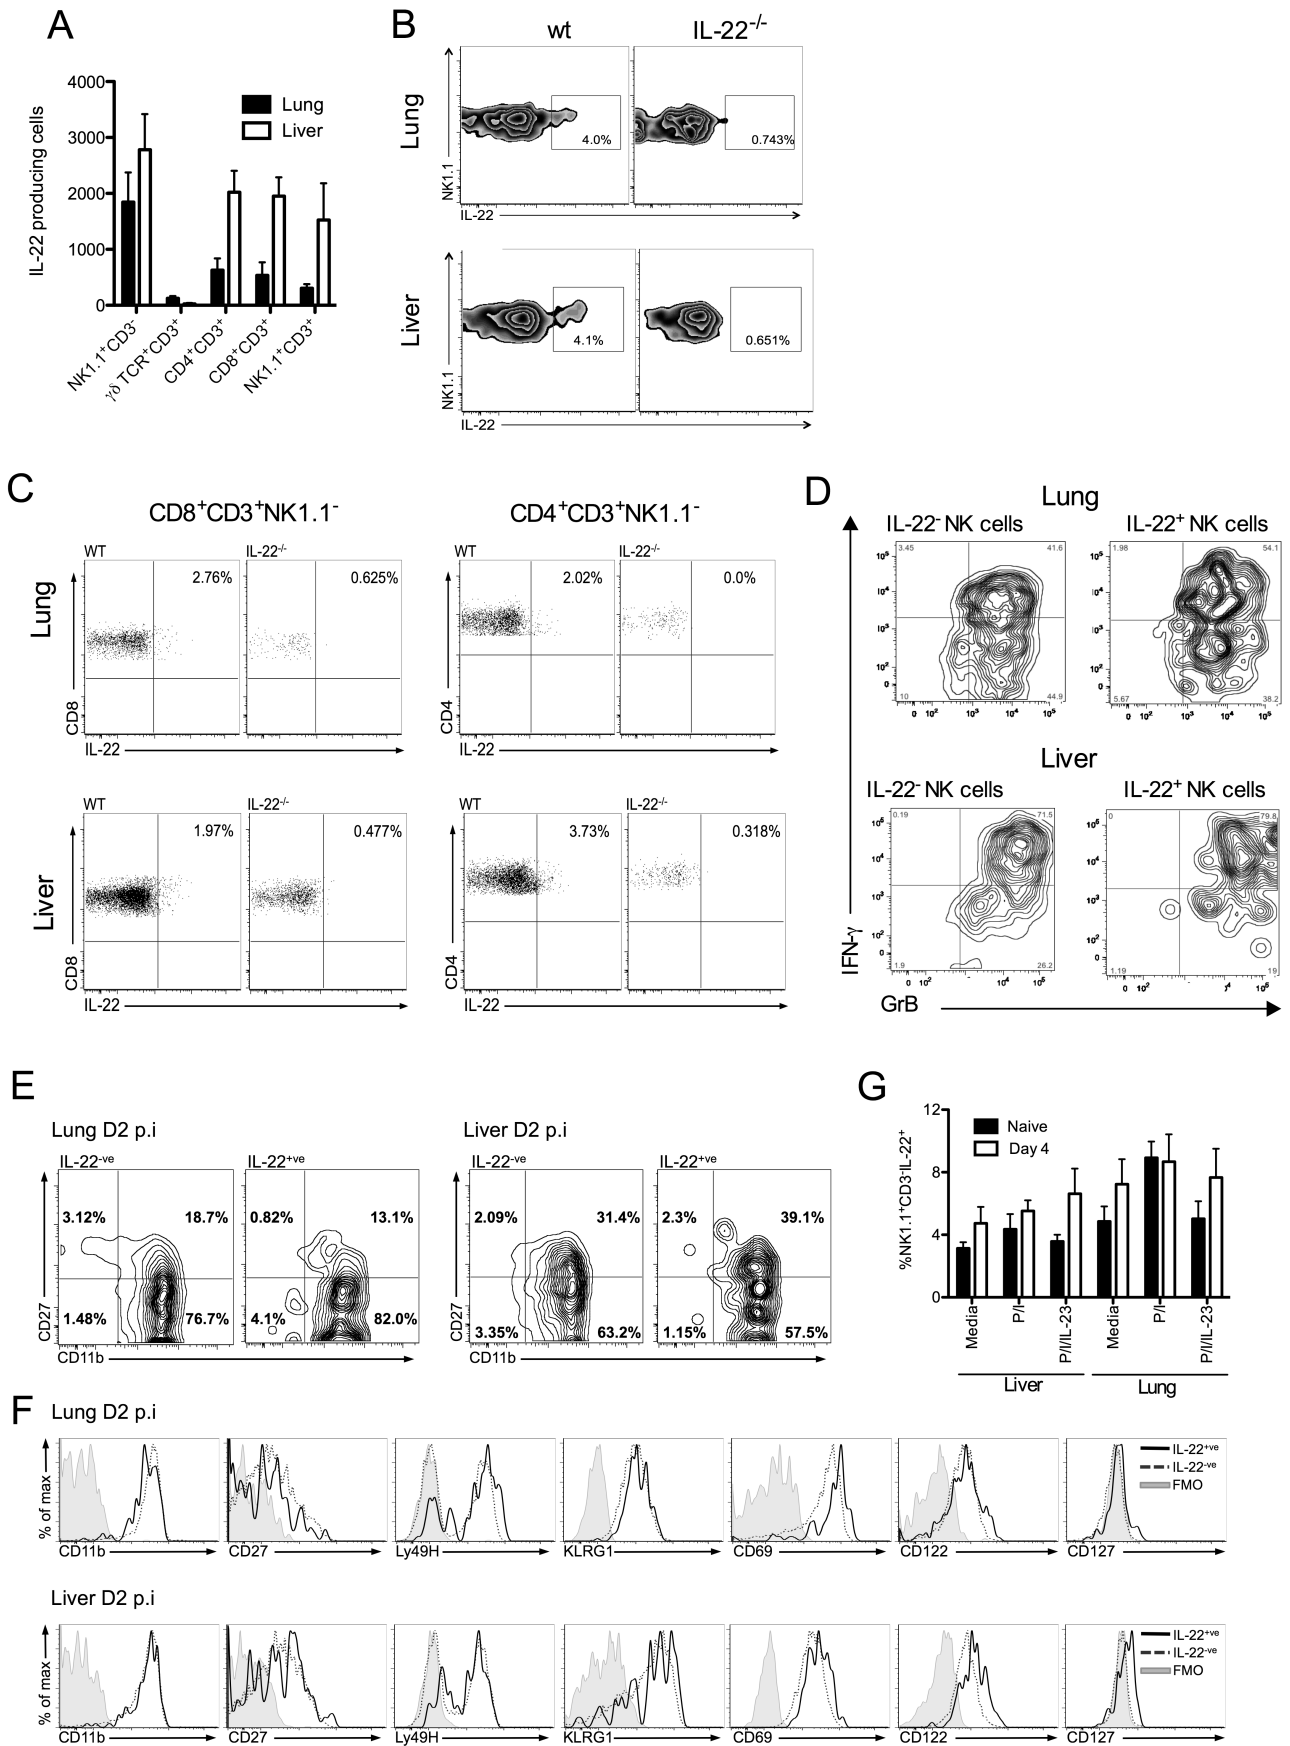

Figure S2

**Figure S2, Related to Figure 2. IL-22 is expressed by conventional NK cells and T cells in response to MCMV infection.** (A) IL-22 expressing leukocytes in lung and liver tissue 2 days post-MCMV infection were quantified by flow cytometry. Results are shown as mean  $\pm$  SEM of 5 mice. (B) Representative plots of IL-22 expression by NK1.1<sup>+</sup>CD3<sup>-</sup> cells in wt and IL-22<sup>-/-</sup> mice d2 pi. (C) Representative FACS plots of IL-22 expression by wt and IL-22<sup>-/-</sup> CD8<sup>+</sup>CD3<sup>-</sup>NK1.1<sup>-</sup> (left) and CD4<sup>+</sup>CD3<sup>-</sup>NK1.1<sup>-</sup> (right) isolated from the lung (top) and liver (bottom) 4 days post-infection. (D) Representative plots of granzyme B and IFN- $\gamma$  co-expression by IL-22<sup>+</sup> and IL-22<sup>-</sup> cells isolated from the lungs and livers 4 days pi. (E) Representative FACS plots of CD27 and CD11b co-expression by IL-22<sup>+</sup> and IL-22<sup>-</sup> NK cells in the lung and liver d2 pi and (F) representative histogram overlays of expression by IL-22<sup>+</sup> (solid line) and IL-22<sup>-</sup> (dotted line) of NK cell markers. Results represent 2 experiments. (G) IL-22 expression by NK1.1<sup>+</sup>CD3<sup>-</sup> cells from naïve and MCMV-infected mice after 4 hours incubation in the presence of brefeldin A, PMA/ionomycin or PMA/ionomycin/IL-23. Mean  $\pm$  SEM of 4 mice/group is shown. Data is representative of 2 independent experiments.

Figure S3

A

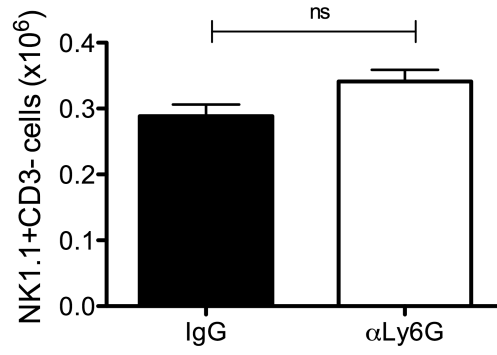

B

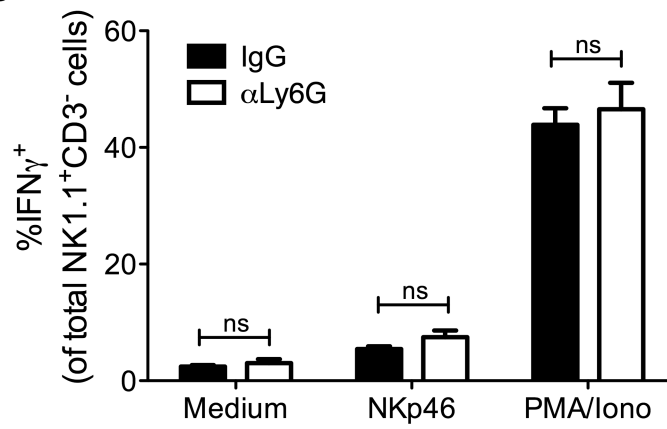

C

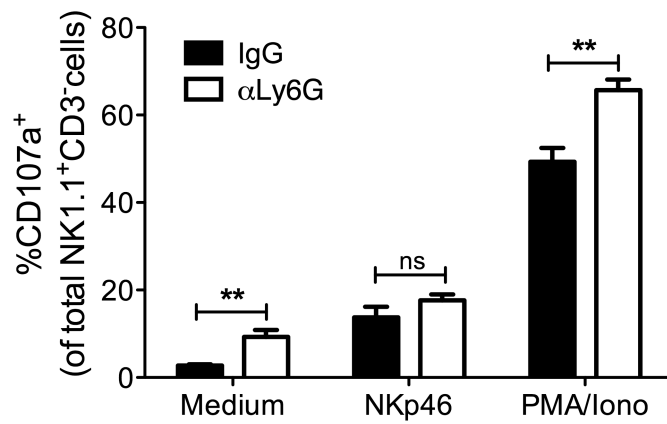

**Figure S3, Related to Figure 6. Neutrophil depletion during MCMV infection does not impair NK cell function.** MCMV-infected mice were treated with IgG (closed bars) or  $\alpha$ Ly6G (open bars). (A) After 4 days, leukocytes were isolated from the liver and NK1.1<sup>+</sup>CD3<sup>-</sup> cells were quantified. (B & C) CD107a mobilization (B) and IFN- $\gamma$  (C) expression by NK1.1<sup>+</sup>CD3<sup>-</sup> cells was measured following 4 hours of incubation in the presence of monensin (A) or brefeldin A (B) in media +/- plate-bound  $\alpha$ NKp46 or PMA/ionomycin. Results are expressed as % positive of all NK1.1<sup>+</sup>CD3<sup>-</sup> cells, as assessed by flow cytometry. Mean + SEM in all graphs is shown from 6 mice per group. \*\* $p \leq 0.01$ , ns=not significant.

Figure S4

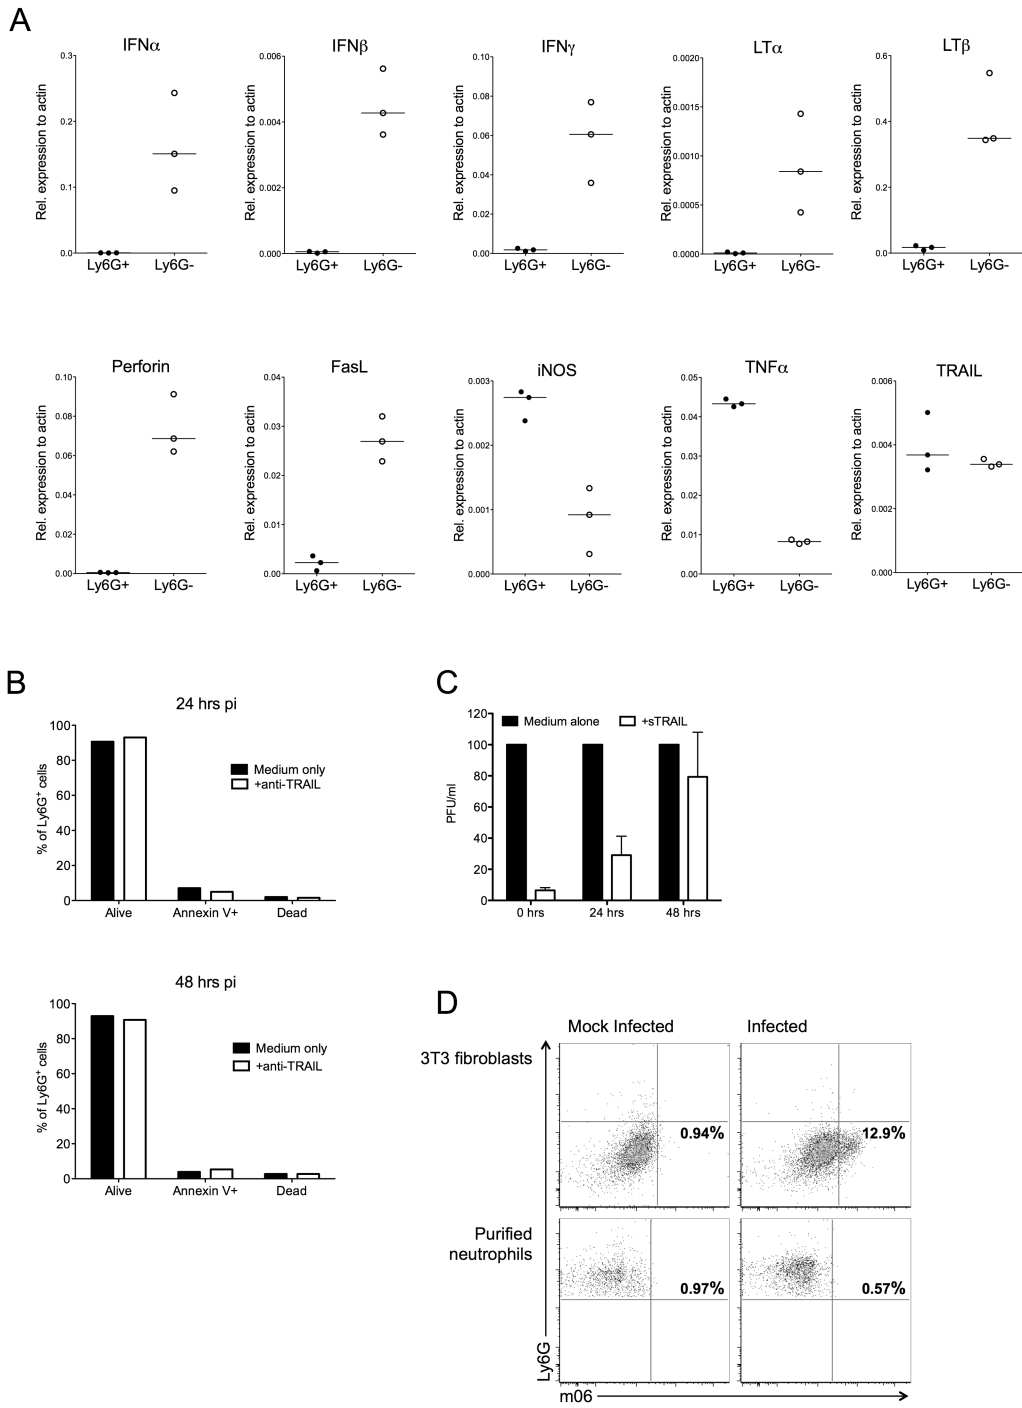



**Figure S4, Related to Figure 7. Neutrophils limit MCMV replication via TRAIL and are not susceptible to MCMV infection.** (A) Ly6G<sup>+</sup> and Ly6G<sup>-</sup> cells were purified from livers of MCMV-infected mice 2 days after infection and mRNA expression of antiviral effector genes assessed by qPCR. Individual mice + mean are shown and results represent 2 experiments. (B) Purified Ly6G<sup>+</sup> neutrophils were co-incubated with MCMV-infected 3T3 fibroblasts (MOI=0.02), and after 24 (top) and 48 (bottom) hours, neutrophil survival was assessed by the absence of Annexin V and live/dead aqua staining. Data represents 2 separate experiments. (C) Soluble TRAIL was added or not to MCMV-infected fibroblasts 0, 24 or 48 hours post-MCMV infection and virus production in supernatants were measured 7 days later. Data from 3 merged experiments are shown. (D) Purified Ly6G<sup>+</sup> neutrophils or 3T3 fibroblasts were mock-infected or infected with MCMV (MOI=0.2) and 24 hours later productively-infected cells were detected with  $\alpha$ m06 antibody.

**Supplementary Table 1, Related to Experimental Procedures.** Primer sequences for qPCR analysis of gene expression.

| <b>Gene of interest</b> | <b>Forward primer</b>    | <b>Reverse primer</b>   |
|-------------------------|--------------------------|-------------------------|
| $\beta$ -actin          | GGGCTATGCTCTCCCTCAC      | GATGTCACGCACGATTTCC     |
| IFN $\alpha$            | GTCAGTGTGAGAAGCTCCTGTGGC | CTATGGTCCAGGCACAGTGACTG |
| IFN $\beta$             | GAATCTCTCCTTTCTCCTG      | CTGACAACCTCCCAGGCAC     |
| IFN $\gamma$            | GCCGTGGCAGTAACAGCC       | AACGCTACACACTGCATCTGGG  |
| LT $\alpha$             | AACCCAAGAATTGGATTCCAGG   | TGTGACCCTTGAAACAACGGT   |
| LT $\beta$              | TGTCTCCAGCTGCGGATTCTA    | TTTGGCAGCTGTTGAACCC     |
| Perforin                | GAGAAGACCTATCAGGACCA     | AGCCTGTGGTAAGCATG       |
| FasL                    | TGAATTACCCATGTCCCCAG     | AAACTGACCCTGGAGGAGCC    |
| iNOS                    | GGCAGCCTGTGAGACCTTTG     | GCATTGGAAGTGAAGCGTTTC   |
| TNF $\alpha$            | CATCTTCTCAAATTCGAGTGACAA | TGGGAGTAGACAAGGTACACCCC |
| TRAIL                   | CCTCTCGGAAAGGGCATTTC     | TCCTGCTCGATGACCAGCT     |
| IL-22R                  | CTACGTGTGCCGAGTGAAGA     | AAGCGTAGGGGTTGAAAGGT    |

## Supplemental Experimental Procedures

### IL-22R Reporter mice

The IL-22RA1 reporter mice were generated as part of the Sanger Mouse Genetics Project (MGP, [www.knockoutmouse.org](http://www.knockoutmouse.org)) using JM8 ES cells on a C57BL/6N background (Pettitt et al., 2009; Skarnes et al., 2011). The targeted *Il22ra1*<sup>tm1a(KOMP)Wtsi</sup> allele comprised a promoter-driven targeted DNA cassette encoding a neomycin-resistance marker, inserted into the first intron (<http://www.sanger.ac.uk/mouseportal/search?query=il22ra1>). The activity of the splice acceptor site within the neomycin cassette formed a truncated, non-functional mRNA containing only one of seven exons (ENSMUSE00000661894).

### Flow cytometry

Leukocytes were stained for surface and intracellular markers with a combination of the following antibodies (from Biolegend, BD Biosciences, eBioscience, R and D Systems or Serotec): Ly6G (1A8), CD11b (M1/70), Ly6B (7/4), F4/80 (BM8), NK1.1 (PK136), CD3 (145-2C11), TCR $\gamma\delta$  (GL3), Gr1 (RB6-8C5), CD4 (RM4-5), CD8 (53-6.7), TRAIL (N2B2), Ly49H (3D10), KLRG-1 (2F1), CD122 (TM- $\beta$ 1), CD27 (LG.3A10), CD127 (A7R34), CD69 (H1.2F3), IL-22 (IC582P)  $\alpha$ IFN- $\gamma$  (XMG1.2) and granzyme B (clone GB11). In some experiments, cells were also stained with  $\alpha$ ROR $\gamma$ T (clone B2D, eBioscience) according to published methodology (Sanos and Diefenbach, 2010). MCMV infection of neutrophils and 3T3 cells was assessed by intracellular staining with  $\alpha$ m06 conjugated to APC (Innova biosciences).

All data were acquired on a BD FACS Canto II. Electronic compensation was performed with antibody-capture beads (BD Biosciences) stained separately with individual antibodies used in the experimental panel. A minimum of 30,000 events was acquired in each case and data analyzed using FlowJo software version 8.5.3 (TreeStar Inc.). Total numbers of different cell populations were calculated by multiplying the total number of viable leukocytes (assessed by trypan blue exclusion) by percent positive cells, as detected by flow cytometry.

### **Histological analysis of neutrophil and MCMV co-localization**

To identify MCMV and neutrophil co-localization, paraffin-embedded liver sections were rehydrated after deparaffinising. Sections were then incubated with pre-warmed 0.01% trypsin for 15mins at 37°C. After blocking steps, sections were stained overnight 4°C with 2µg/ml αm123 (Croma 101, a kind gift from Stipan Jonjić, University of Rijeka) and visualized with DAB (Vector Labs). Slides were then counterstained with 2µg/ml αLy6G (1A8, Bioxcell) for 1 hour at room temperature, visualized with VIP Chromogen solution (Vector Labs) and counterstained with hematoxylin. Images were acquired using a Nikon Eclipse 80I microscope and Nikon ACT1 software.

### **Assessment of Ly6G<sup>+</sup> and Ly6G<sup>-</sup> gene expression**

To examine neutrophil-specific gene expression, leukocytes were isolated from the livers of MCMV-infected mice, stained at 4°C with αLy6G-PE and separated by positive selection with αPE beads according to manufacturers

instructions (Miltenyi Biotec). RNA from positive (>80% Ly6G<sup>+</sup>) and negative fractions (<2% Ly6G<sup>+</sup>) was then extracted using an RNAeasy plus kit (Qiagen), treated with DNase and cDNA was synthesized with a TaqMan reverse transcription kit (Applied Biosystems). Tissue RNA was extracted with RNAeasy kit and cDNA was synthesized as above. Gene expression was then assayed quantitative PCR using a Mini Opticon (Bio-Rad) and Platinum SYBR green mastermix reagent (Biorad). All primer sequences for gene detection are provided in Supplemental Table 1.

### **Neutrophil purification for *in vitro* killing assay**

To purify neutrophils from RAG<sup>-/-</sup> spleens, splenocytes were first incubated with EasySep mouse neutrophil enrichment negative selection cocktail, washed and incubated with EasySep biotin selection cocktail. The cells were then incubated with EasySep magnetic particles and run through an LS column (Miltenyi). The negative fraction was then subjected to  $\alpha$ Ly6G-PE staining, and positive selection as described above. The purity of the separated cell fractions were assessed by flow cytometry to be  $\geq 97\%$ . In some experiments, neutrophils were isolated on days stated in legends and neutrophil death/apoptosis assessed with Live/Dead Fixable Aqua (Invitrogen) and Annexin-V (BD Biosciences), according to manufacturer's instructions.

## Supplemental References

Pettitt, S.J., Liang, Q., Rairdan, X.Y., Moran, J.L., Prosser, H.M., Beier, D.R., Lloyd, K.C., Bradley, A., and Skarnes, W.C. (2009). Agouti C57BL/6N embryonic stem cells for mouse genetic resources. *Nat Methods* 6, 493-495.

Sanos, S.L., and Diefenbach, A. (2010). Isolation of NK cells and NK-like cells from the intestinal lamina propria. *Methods Mol Biol* 612, 505-517.

Skarnes, W.C., Rosen, B., West, A.P., Koutsourakis, M., Bushell, W., Iyer, V., Mujica, A.O., Thomas, M., Harrow, J., Cox, T., *et al.* (2011). A conditional knockout resource for the genome-wide study of mouse gene function. *Nature* 474, 337-342.
